# Supplementary material for: The encapsulin from Thermotoga maritima is a flavoprotein with a symmetry matched ferritin-like cargo protein
Source: PubMed Central journal article supplement (PMC8610991; doi:10.1038/s41598-021-01932-w), 2021-11-23
Supplement: 41598_2021_1932_MOESM1_ESM.pdf [file 41598_2021_1932_MOESM1_ESM.pdf]

## Supplementary Information for:

### The encapsulin from *Thermotoga maritima* is a flavoprotein with a symmetry matched ferritin-like cargo protein

Benjamin J. LaFrance,<sup>1,†</sup> Caleb Cassidy-Amstutz,<sup>1,†</sup> Robert J. Nichols,<sup>1</sup> Luke M. Oltrogge,<sup>1</sup> Eva Nogales,<sup>1,2,3</sup> David F. Savage<sup>1\*</sup>

<sup>1</sup> Department of Molecular and Cell Biology, University of California Berkeley, Berkeley, CA, USA.

<sup>2</sup> Howard Hughes Medical Institute, University of California, Berkeley, CA, USA.

<sup>3</sup> Molecular Biophysics and Integrated Bioimaging Division, Lawrence Berkeley National Laboratory, Berkeley, CA, USA.

<sup>†</sup>these authors contributed equally to this work

\*savage@berkeley.edu

The Supplementary Information file contains:

Figs. S1 to S6

Table S1

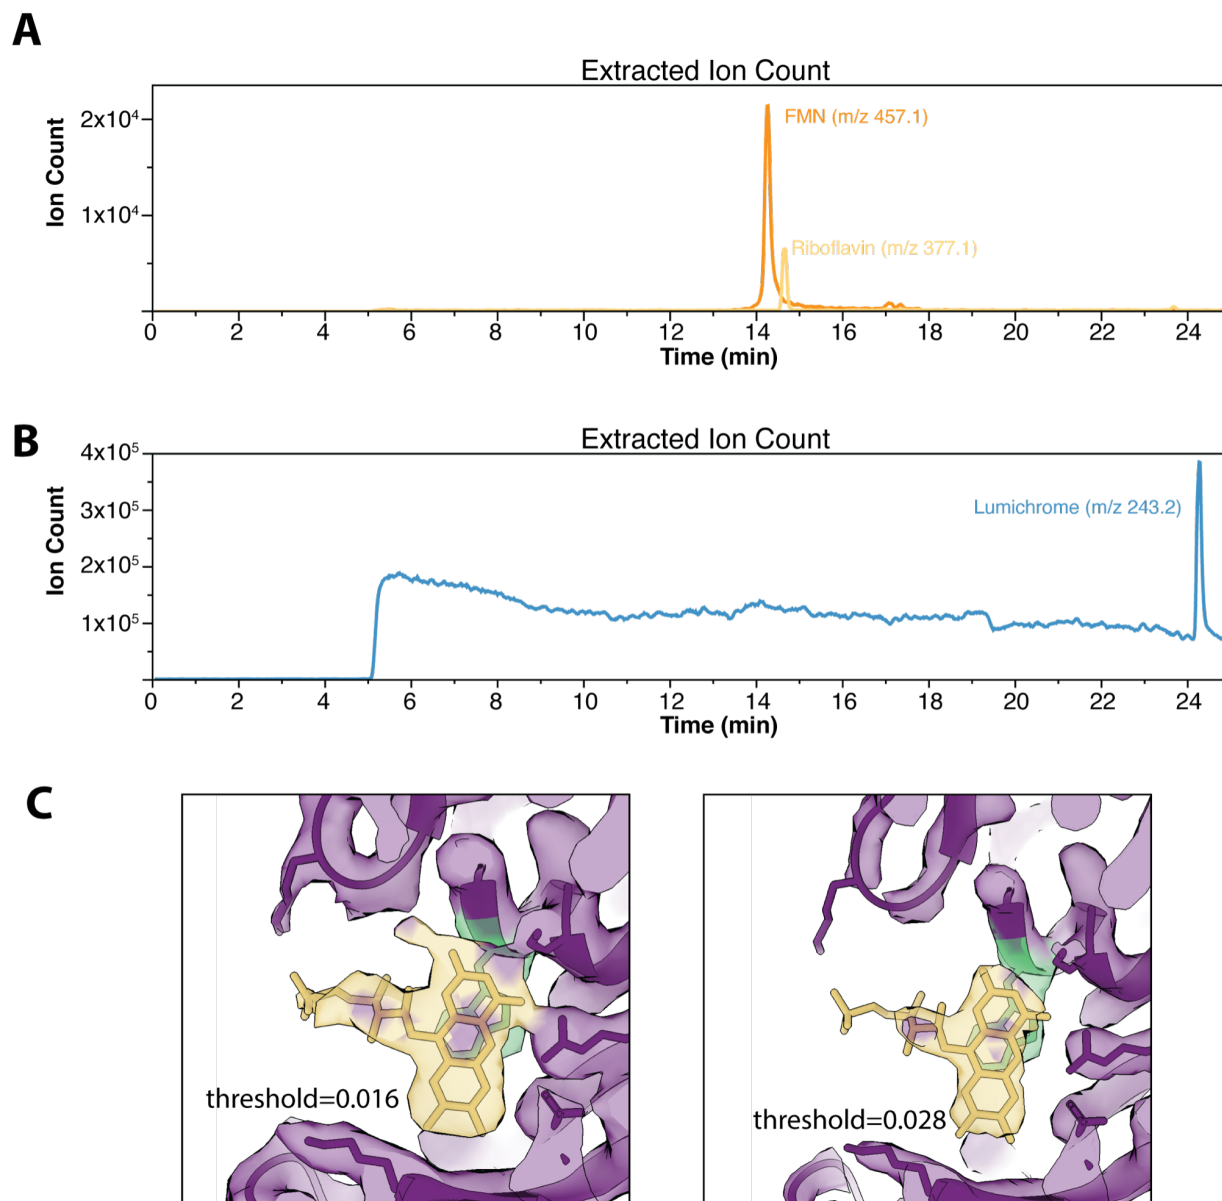

**Fig. S1. Mass spectrometry confirms flavin presence in the *T. maritima* encapsulin.** (A) and (B) Extracted ion counts show that FMN (orange) riboflavin (yellow), and lumichrome (blue) are all present within a pure *T. maritima* encapsulin sample. (C) CryoEM density of the flavin at two different thresholds showing density for the FMN and riboflavin R-group that is absent in the lumichrome degradation product.

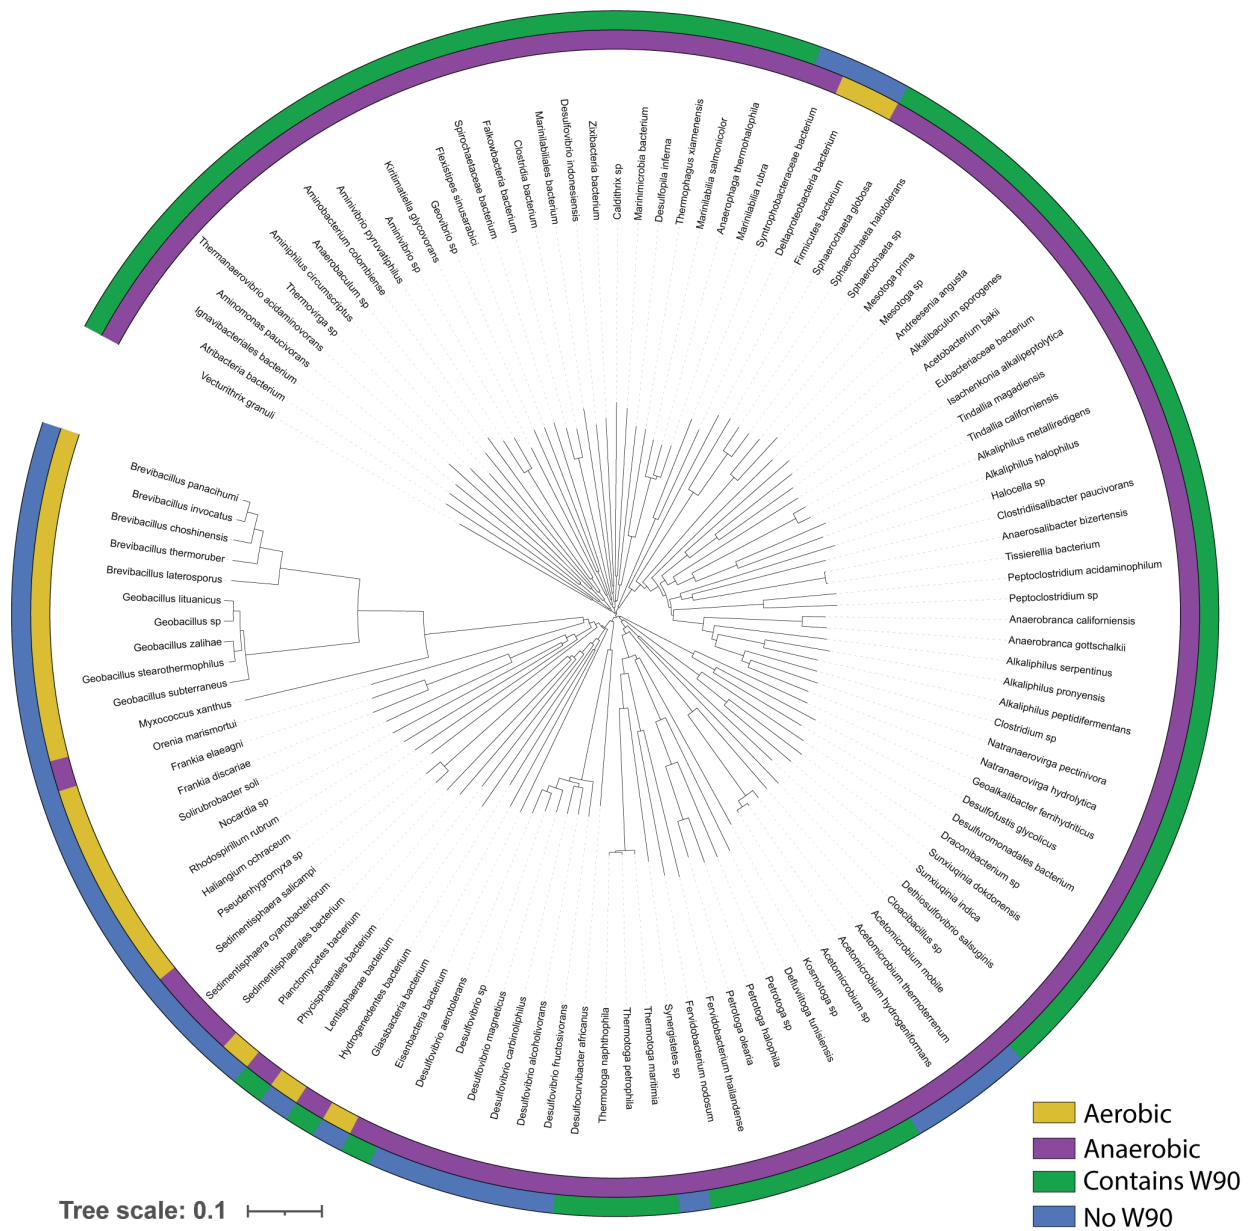

**Fig. S2. Phylogenetic tree of encapsulins with FLP cargo.** Phylogenetic Analysis of encapsulins related to *Thermotoga maritima*. Encapsulins that contain the W90 residue are green, with all other residues colored in blue. Encapsulins found in aerobic species are in yellow, and strict anaerobes are in purple. All W90-containing encapsulins occur in anaerobic species, however not all anaerobic species contain the W90 residue.

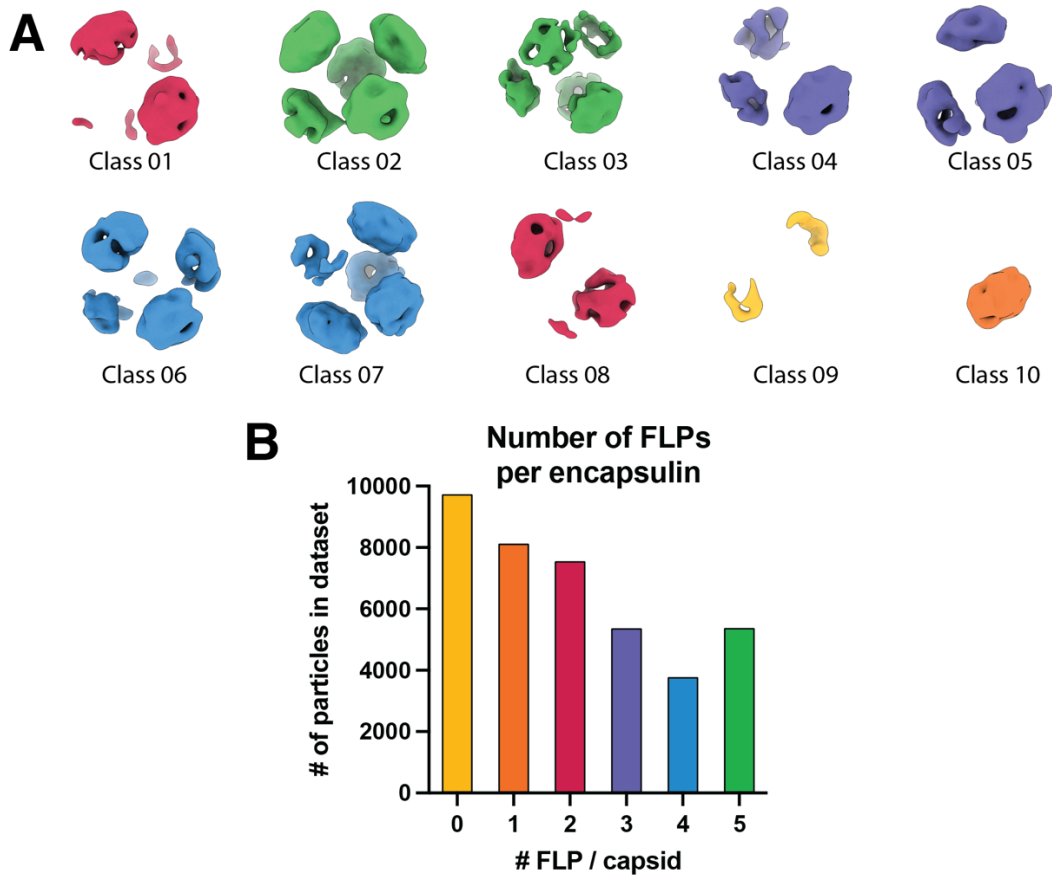

**Fig. S3. Number of FLP cargo per capsid shell.** 3D classification and analysis to determine the distribution of FLP cargo proteins per capsid shell. **(A)** 10 classes obtained from an alignment-free 3D classification. A mask was applied to the original C1 reconstruction to classify only the cargo FLPs. Class averages show the number of FLPs quite unambiguously. However, in rare cases where individual FLP density was weak, we compared an individual FLP density to an artificial volume created from a 10Å map of a known FLP homolog (pdb:5da5); if the weak FLP density occupied a volume less than 50% of the expected size, it was not counted. **(B)** Analysis of #FLPs/capsid for the dataset collected shown as a bar graph. Various loading levels from 0-5 FLPs/capsid were observed with a decreasing number of particles with increasing levels of loading.

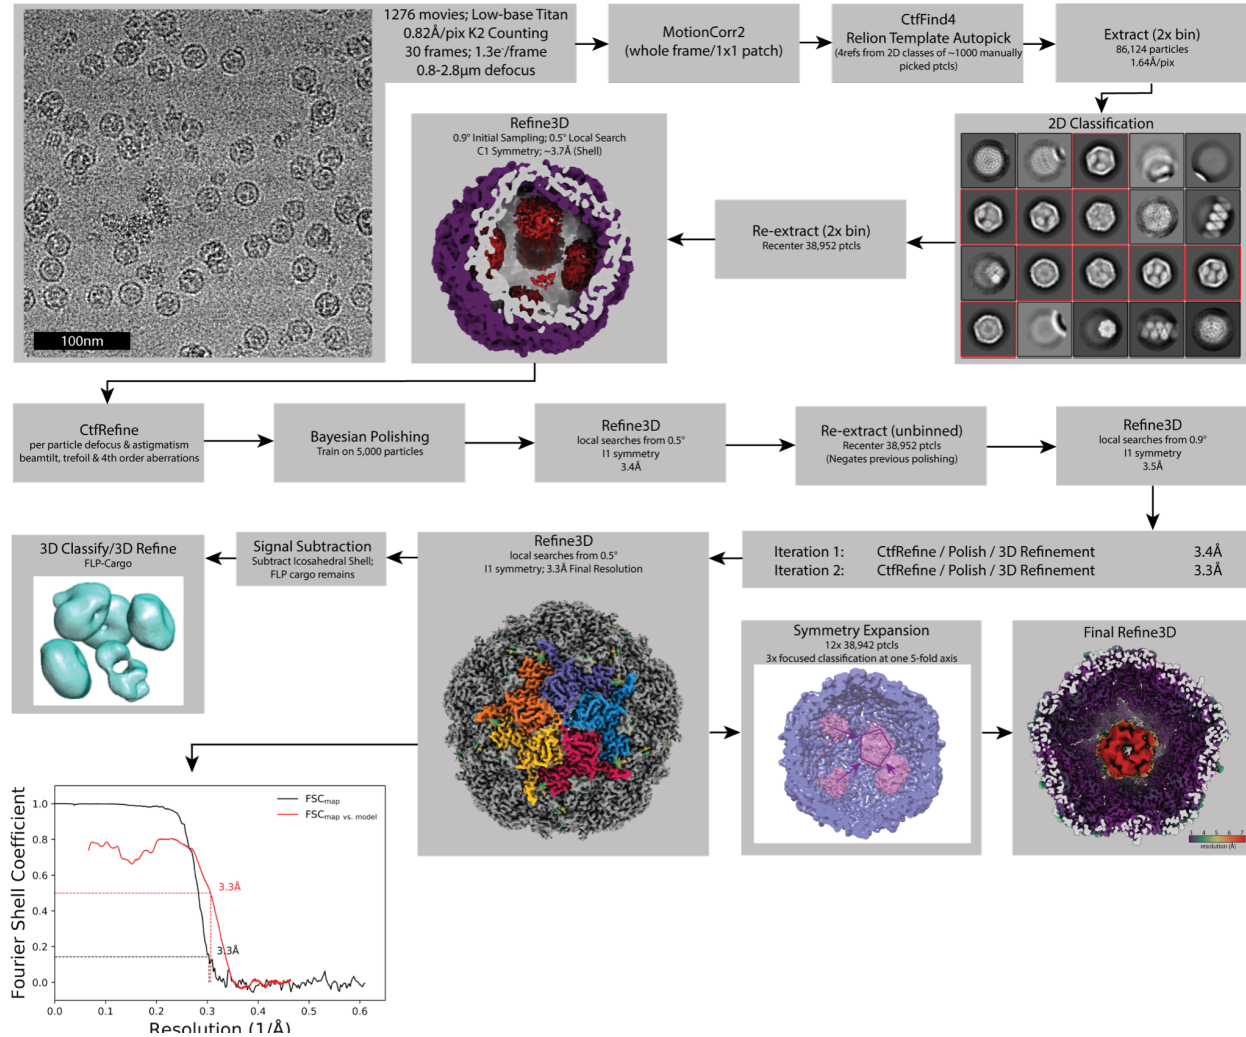

**Fig. S4. Cryo-EM Processing Pipeline.** Workflow used for obtaining a high-resolution encapsulin shell, as well as the symmetry expansion technique used for defining one of the possible FLP-cargo orientations relative to the shell.

### A FLP-Encapsulin Aerobic Ferroxidase (Iron Storage) Assay

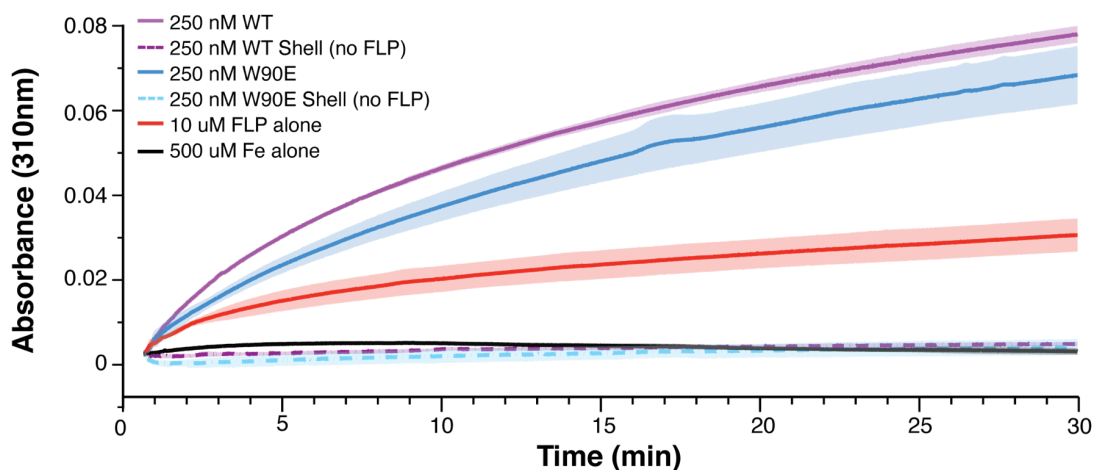

### B FLP-Encapsulin Anaerobic Ferroxidase (Iron Storage) Assay

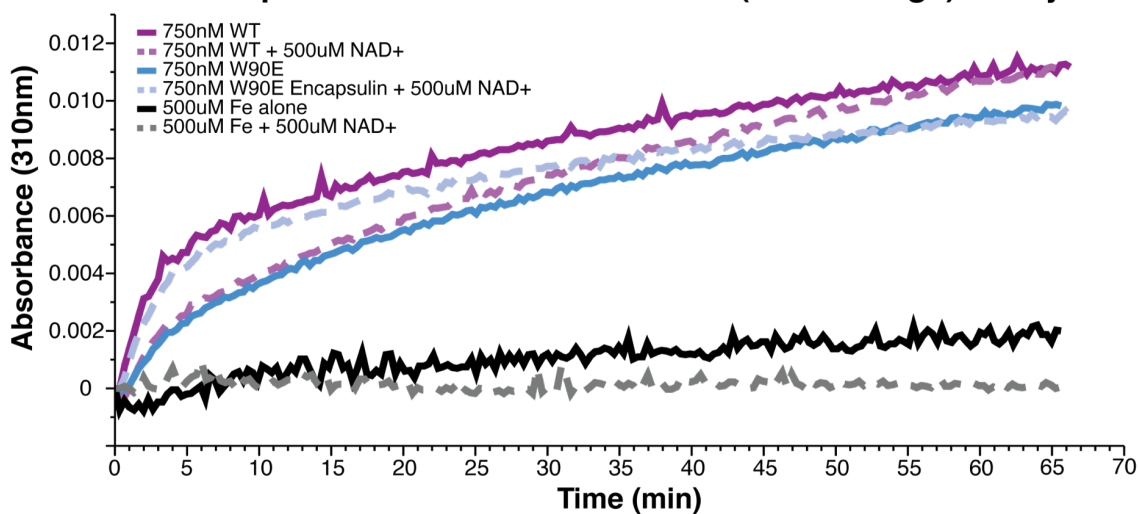

**Fig. S5. The ferroxidase activity of different encapsulin constructs.** All assays were performed in the presence of 500uM Fe. **(A)** Shows the ability of different encapsulins to store iron under aerobic conditions. Traces are n=3 average with the envelope representing STD. **(B)** Ferroxidase activity under anaerobic conditions. Traces represent an average of n=3. Both WT encapsulin and the W90E mutant retain the ability to store iron regardless of aerobic/anaerobic, with no significant statistical difference between the two.

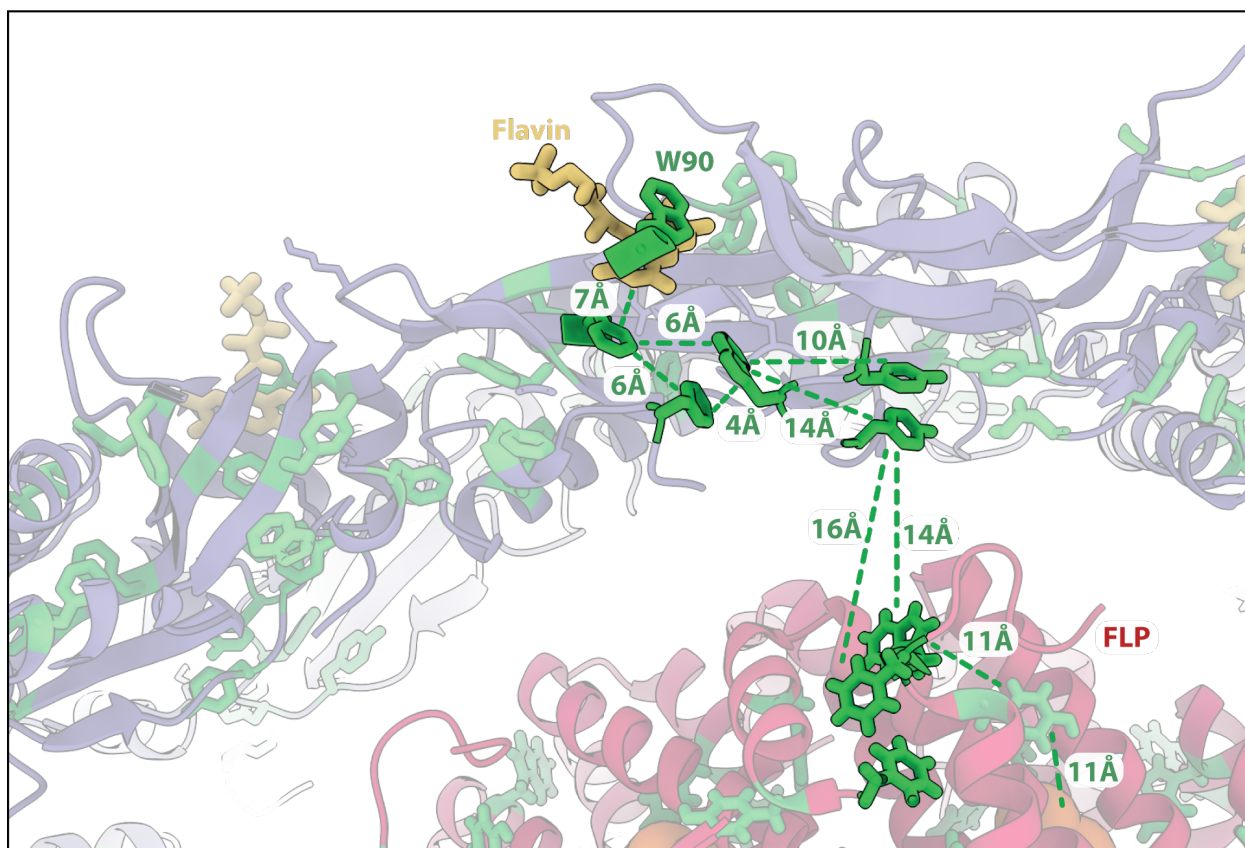

**Fig. S6. Aromatics positioned between the flavin molecule and the FLP active site.** Distances (in angstroms) between aromatic side chains that could serve as an electron conduit between the flavin (yellow) on the shell periphery and the active site of the encapsulated FLP cargo (orange).

|                                                     |                                  |
|-----------------------------------------------------|----------------------------------|
| <b>Dataset</b>                                      | <b>Encapsulin Shell with FLP</b> |
| Microscope                                          | Low-base Titan                   |
| Stage Type                                          | Side-entry, Gatan 626            |
| Voltage (kV)                                        | 300                              |
| Detector                                            | Gatan K2                         |
| Data Collection Software                            | Leginon                          |
| Acquisition mode                                    | Counting                         |
| Physical pixel size (Å)                             | 0.82                             |
| Defocus range (µm)                                  | 0.8-2.8                          |
| Electron exposure (e <sup>-</sup> /Å <sup>2</sup> ) | 40                               |
| <b>Reconstruction</b>                               | <b>EMD-24001</b>                 |
| Session                                             | 17Mar02                          |
| Software                                            | RELION 3.1                       |
| Particles picked                                    | 86,124                           |
| Particles final                                     | 38,952                           |
| Extraction box size (pixels)                        | 512 <sup>3</sup>                 |
| Final pixel size (Å)                                | 0.82                             |
| Map resolution (Sym; Å)                             | 3.3                              |
| Map sharpening B-factor (Å <sup>2</sup> )           | -150                             |
| <b>Coordinate refinement</b>                        |                                  |
| Software                                            | PHENIX                           |
| Refinement algorithm                                | REAL SPACE                       |
| Resolution cutoff (Å)                               | 3.3                              |
| FSC <sub>model-vs-map</sub> =0.5 (Å)                | 3.3                              |
| <b>Model</b>                                        | <b>PDB-7MU1</b>                  |
| Number of residues                                  | 264                              |
| B-factor overall                                    | 38                               |
| R.M.S. deviations                                   |                                  |
| Bond lengths (Å)                                    | 0.004                            |
| Bond angles (°)                                     | 0.625                            |
| <b>Validation</b>                                   |                                  |
| Molprobit clashscore                                | 6.68                             |
| Rotamer outliers (%)                                | 0.0                              |
| C <sub>β</sub> deviations (%)                       | 0.0                              |
| Ramachandran plot                                   |                                  |
| Favored (%)                                         | 96.95                            |
| Allowed (%)                                         | 3.05                             |
| Outliers (%)                                        | 0.0                              |

**Table S1. Data collection, 3D reconstruction, and refinement statistics.**
